# Supplementary material for: Follow-Up After Discharge From an Inpatient Psychiatric Facility
Source: Atypon-hosted journal article supplement (doi:10.1176/appi.ps.201700043), 2017-08-01
Supplement: appi.ps.201700043.ds001.pdf [file appi.ps.201700043.ds001.pdf]

Publisher: APA; Journal: PS:Psychiatric Services;  
 Copyright: 2017, ; Volume: 00; Issue: 0; Manuscript: 201700043; Month: ; Year: 2017  
 DOI: 10.1176/appi.ps.201700043; TOC Head: ; Section Head: Letters  
 Article Type: Letters; Collection Codes: , , , ,

## Follow-up after IPF hospitalization among nondual FFS Medicare beneficiaries, by state

| State/region          | Number of discharges | Number of facilities | Average facility-level performance on 7-day follow-up measure | Average facility-level performance on 30-day follow-up measure |
|-----------------------|----------------------|----------------------|---------------------------------------------------------------|----------------------------------------------------------------|
| <b>All facilities</b> | 61871                | 1,669                | 28.7                                                          | 53.5                                                           |
| <b>East</b>           | 15258                | 398                  | 36.0                                                          | 59.0                                                           |
| New Hampshire         | 435                  | 12                   | 50.0                                                          | 73.7                                                           |
| Vermont               | 113                  | 4                    | 53.8                                                          | 71.5                                                           |
| Maine                 | 153                  | 7                    | 41.7                                                          | 65.8                                                           |
| Massachusetts         | 1731                 | 55                   | 40.9                                                          | 67.3                                                           |
| Connecticut           | 1124                 | 33                   | 39.4                                                          | 64.0                                                           |
| Pennsylvania          | 3261                 | 100                  | 30.3                                                          | 57.2                                                           |
| Rhode Island          | 347                  | 6                    | 30.3                                                          | 55.8                                                           |
| New Jersey            | 2411                 | 52                   | 33.3                                                          | 55.3                                                           |
| New York              | 5362                 | 129                  | 36.6                                                          | 55.1                                                           |
| Delaware              | 321                  | 4                    | 32.9                                                          | 53.2                                                           |
| <b>Midwest</b>        | 14660                | 429                  | 29.3                                                          | 58.6                                                           |
| Michigan              | 3337                 | 62                   | 37.2                                                          | 65.1                                                           |
| Iowa                  | 488                  | 28                   | 33.5                                                          | 62.9                                                           |
| North Dakota          | 243                  | 10                   | 30.0                                                          | 62.6                                                           |
| Wisconsin             | 1029                 | 32                   | 32.5                                                          | 61.4                                                           |
| South Dakota          | 164                  | 4                    | 23.9                                                          | 60.1                                                           |
| Indiana               | 1031                 | 50                   | 32.1                                                          | 59.0                                                           |
| Nebraska              | 211                  | 9                    | 35.8                                                          | 58.8                                                           |
| Minnesota             | 760                  | 29                   | 23.1                                                          | 58.7                                                           |
| Missouri              | 1879                 | 44                   | 26.7                                                          | 57.1                                                           |
| Kansas                | 550                  | 26                   | 28.2                                                          | 56.7                                                           |
| Illinois              | 2425                 | 64                   | 27.0                                                          | 55.4                                                           |
| Ohio                  | 2543                 | 71                   | 23.6                                                          | 53.6                                                           |
| <b>South</b>          | 25314                | 620                  | 24.6                                                          | 49.1                                                           |
| West Virginia         | 510                  | 14                   | 30.5                                                          | 61.2                                                           |
| Virginia              | 1730                 | 39                   | 28.4                                                          | 58.3                                                           |
| North Carolina        | 1993                 | 41                   | 27.0                                                          | 54.7                                                           |
| South Carolina        | 1244                 | 21                   | 23.0                                                          | 54.5                                                           |
| Florida               | 4287                 | 61                   | 28.4                                                          | 52.7                                                           |
| Kentucky              | 846                  | 27                   | 23.5                                                          | 52.2                                                           |
| Texas                 | 4600                 | 86                   | 26.4                                                          | 51.0                                                           |
| Tennessee             | 1686                 | 49                   | 20.8                                                          | 50.8                                                           |
| Alabama               | 1325                 | 41                   | 18.0                                                          | 47.3                                                           |
| Louisiana             | 1598                 | 76                   | 33.2                                                          | 46.3                                                           |
| Georgia               | 2527                 | 37                   | 19.2                                                          | 43.6                                                           |
| Maryland              | 396                  | 8                    | 28.5                                                          | 43.5                                                           |
| Arkansas              | 665                  | 34                   | 17.4                                                          | 42.6                                                           |
| Mississippi           | 889                  | 49                   | 20.6                                                          | 40.8                                                           |
| Oklahoma              | 1018                 | 33                   | 16.3                                                          | 40.0                                                           |

| State/region                | Number of discharges | Number of facilities | Average facility-level performance on 7-day follow-up measure | Average facility-level performance on 30-day follow-up measure |
|-----------------------------|----------------------|----------------------|---------------------------------------------------------------|----------------------------------------------------------------|
| <b>West</b>                 | 6167                 | 210                  | 25.6                                                          | 46.2                                                           |
| <b>Montana</b>              | 79                   | 3                    | 30.2                                                          | 64.2                                                           |
| <b>Wyoming</b>              | 47                   | 6                    | 17.2                                                          | 64.2                                                           |
| <b>Utah</b>                 | 276                  | 11                   | 33.3                                                          | 57.9                                                           |
| <b>New Mexico</b>           | 273                  | 10                   | 26.7                                                          | 54.7                                                           |
| <b>Colorado</b>             | 567                  | 20                   | 31.7                                                          | 52.6                                                           |
| <b>Washington</b>           | 516                  | 20                   | 27.3                                                          | 52.3                                                           |
| <b>Arizona</b>              | 810                  | 18                   | 27.6                                                          | 47.0                                                           |
| <b>Hawaii</b>               | 32                   | 4                    | 35.5                                                          | 45.8                                                           |
| <b>Oregon</b>               | 281                  | 10                   | 24.2                                                          | 43.9                                                           |
| <b>California</b>           | 2517                 | 88                   | 24.0                                                          | 41.1                                                           |
| <b>Nevada</b>               | 609                  | 10                   | 21.0                                                          | 40.0                                                           |
| <b>Idaho</b>                | 133                  | 8                    | 15.3                                                          | 36.9                                                           |
| <b>Alaska</b>               | 27                   | 2                    | 17.9                                                          | 35.7                                                           |
| <b>Other</b>                | 472                  | 12                   | 25.5                                                          | 44.2                                                           |
| <b>District of Columbia</b> | 158                  | 6                    | 31.4                                                          | 46.7                                                           |
| <b>Puerto Rico</b>          | 314                  | 6                    | 19.7                                                          | 41.7                                                           |

Note: Sample size is 61,871 discharges among 1,669 IPFs using calendar year 2008 FFS Medicare claims. Within each region, states are arranged from highest to lowest performance on the 30-day measure
